# Supplementary material for: Trends in Interregional Travel to Shopping Malls and Restaurants Before and After Differential COVID-19 Restrictions in the Greater Toronto Area
Source: PubMed Central journal article supplement (PMC8408668; doi:10.1001/jamanetworkopen.2021.23139), 2021-08-31
Supplement: jamanetwopen-e2123139-s001.pdf [file jamanetwopen-e2123139-s001.pdf]

## Supplemental Online Content

Soucy JPR, Ghasemi A, Sturrock SL, et al. Trends in interregional travel to shopping malls and restaurants before and after differential COVID-19 restrictions in the Greater Toronto Area. *JAMA Netw Open*. 2021;4(8):e2123139. doi:10.1001/jamanetworkopen.2021.23139

**eFigure 1.** Map of the 5 Regions Comprising the Greater Toronto Area

**eTable 1.** Neighborhood Sociodemographic Characteristics by Dissemination Area of Toronto and Peel Residents Included in the Veraset Mobile Device Sample

This supplemental material has been provided by the authors to give readers additional information about their work.

**eFigure.** Map of the 5 Regions Comprising the Greater Toronto Area

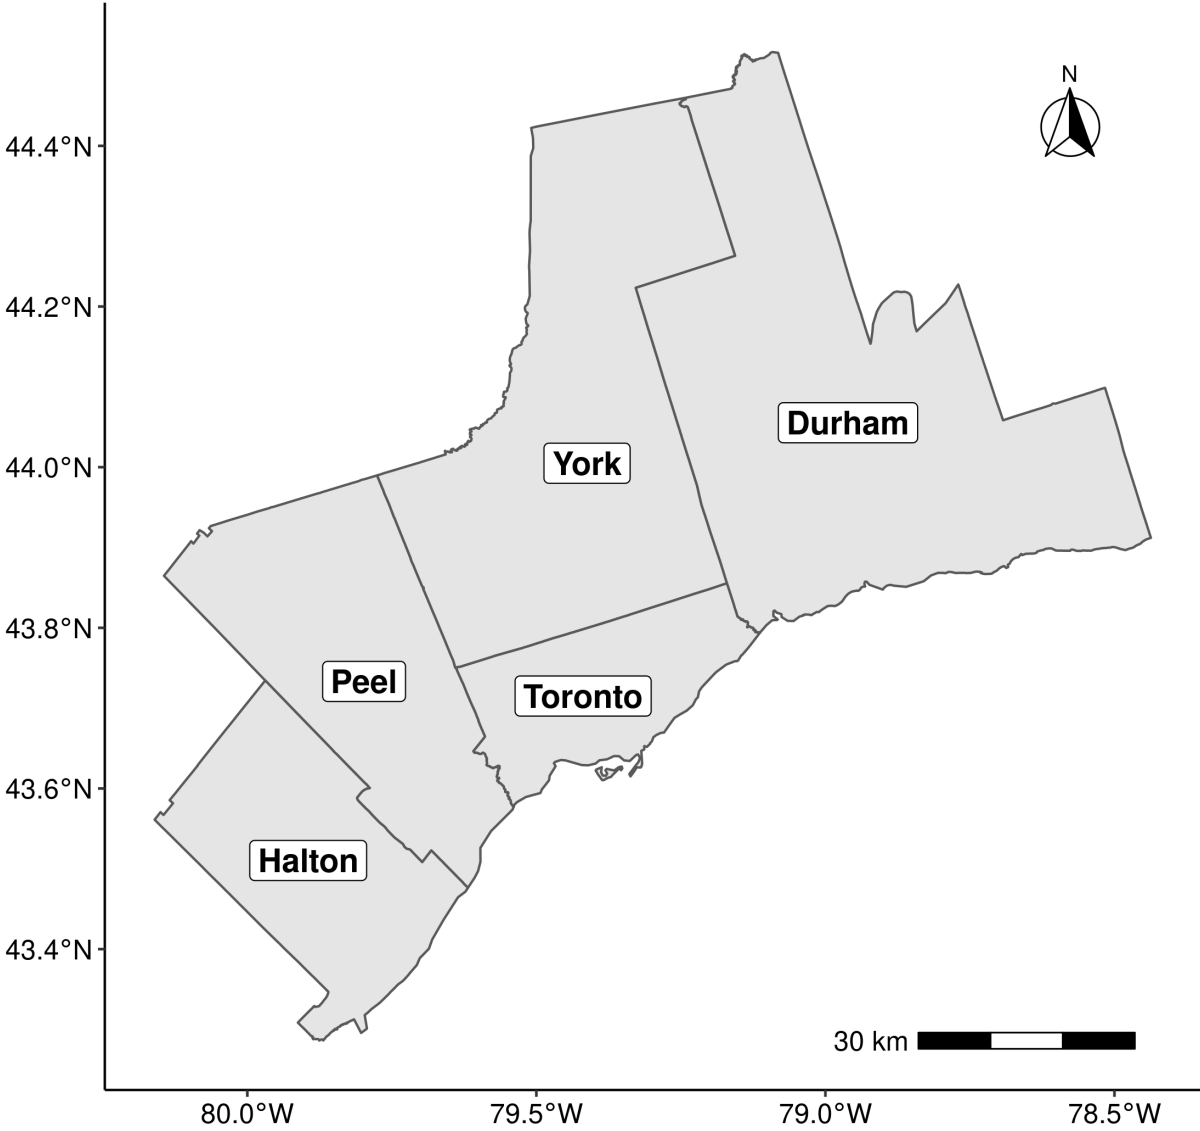

**eTable.** Neighborhood Sociodemographic Characteristics by Dissemination Area of Toronto and Peel Residents Included in the Veraset Mobile Device Sample<sup>a</sup>

|                                    | Toronto           |                   |                    | Peel              |                   |                    |
|------------------------------------|-------------------|-------------------|--------------------|-------------------|-------------------|--------------------|
|                                    | Visitors          | Full sample       | General population | Visitors          | Full sample       | General population |
| <b>Labor force characteristics</b> |                   |                   |                    |                   |                   |                    |
| Percentage of essential workers    | 44.8 (31.8, 58.4) | 46.5 (32.3, 59.0) | 45.5 (31.5, 58.8)  | 50.7 (43.5, 58.5) | 51.2 (43.6, 58.5) | 52.5 (44.1, 60.4)  |
| <b>Immigration and race</b>        |                   |                   |                    |                   |                   |                    |
| Percentage visible minority        | 48.5 (28.8, 73.6) | 49.9 (27.4, 74.0) | 50.7 (27.3, 75.5)  | 70.7 (42.2, 83.7) | 70.1 (41.1, 83.0) | 68.9 (42.7, 83.2)  |
| Percentage recent immigrant        | 5.6 (2.6, 9.4)    | 4.8 (2.2, 8.8)    | 5.3 (2.4, 9.7)     | 5.7 (3.0, 9.6)    | 5.8 (2.9, 9.1)    | 6.0 (2.9, 9.4)     |
| <b>Socioeconomic status</b>        |                   |                   |                    |                   |                   |                    |
| Percentage low income              | 16.3 (11.0, 26.3) | 15.7 (10.7, 25.2) | 16.8 (10.7, 27.5)  | 10.5 (7.4, 14.5)  | 10.2 (7.2, 13.8)  | 10.1 (7.5, 16.0)   |
| <b>Housing</b>                     |                   |                   |                    |                   |                   |                    |
| Average household size             | 2.6 (2.1, 3.0)    | 2.7 (2.2, 3.1)    | 2.6 (2.1, 3.0)     | 3.4 (2.9, 3.8)    | 3.4 (2.9, 3.8)    | 3.3 (2.9, 3.8)     |
| Percentage multigenerational       | 19.5 (9.0, 32.3)  | 18.3 (8.6, 31.8)  | 18.3 (8.5, 32.4)   | 11.0 (5.9, 26.0)  | 12.0 (6.1, 26.9)  | 11.9 (6.2, 25.6)   |
| Unsuitably crowded housing         | 8.9 (5.3, 16.4)   | 8.8 (4.7, 16.0)   | 9.5 (5.3, 17.7)    | 8.5 (5.4, 12.8)   | 8.2 (5.3, 12.5)   | 8.6 (5.3, 13.8)    |

<sup>a</sup> Neighborhood sociodemographic characteristics by dissemination area of Toronto and Peel residents included in the Veraset mobile device sample (mall and restaurant visitors and the full sample, visitors, and nonvisitors) vs the general population (all dissemination areas) from November 16, 2020, to November 29, 2020. Median values shown (interquartile range, IQR, in brackets). Total samples sizes are 154,089 (full sample) and 11,527 (mall and restaurant visitors). Each dissemination area represents approximately 400 to 700 residents. All sociodemographic data were obtained from the 2016 Canadian census. Veraset collects its mobility data from a variety of third-party providers such as mobile application developers. The median reported location accuracy in this dataset was 11.8 m.
